# Supplementary material
Source: PubMed Central journal article supplement (PMC7577276)
Supplement: mmc1.pdf [file mmc1.pdf]

**Questionnaire on Self-medication practices using Analgesics as NSAIDs and Acetaminophen**

**[SECTION: A]**

|                                        |
|----------------------------------------|
| <b>General Demographic Information</b> |
|----------------------------------------|

|           |                                        |  |
|-----------|----------------------------------------|--|
| <b>1.</b> | <b>Name of the University/College:</b> |  |
|-----------|----------------------------------------|--|

|           |                    |         |  |      |  |         |  |
|-----------|--------------------|---------|--|------|--|---------|--|
| <b>2.</b> | <b>Department:</b> | Nursing |  | Home |  | English |  |
|-----------|--------------------|---------|--|------|--|---------|--|

|           |                   |          |  |                      |  |                      |  |                      |  |
|-----------|-------------------|----------|--|----------------------|--|----------------------|--|----------------------|--|
| <b>3.</b> | <b>Study Year</b> | Ist Year |  | 2 <sup>nd</sup> Year |  | 3 <sup>rd</sup> Year |  | 4 <sup>th</sup> Year |  |
|-----------|-------------------|----------|--|----------------------|--|----------------------|--|----------------------|--|

|           |               |      |  |        |  |
|-----------|---------------|------|--|--------|--|
| <b>4.</b> | <b>Gender</b> | Male |  | Female |  |
|-----------|---------------|------|--|--------|--|

|           |                        |       |  |         |  |       |  |
|-----------|------------------------|-------|--|---------|--|-------|--|
| <b>5.</b> | <b>Age (in Years):</b> | 18-22 |  | 22 – 30 |  | 30-35 |  |
|-----------|------------------------|-------|--|---------|--|-------|--|

|           |                           |  |  |  |  |  |  |  |
|-----------|---------------------------|--|--|--|--|--|--|--|
| <b>6.</b> | <b>Number of Siblings</b> |  |  |  |  |  |  |  |
|-----------|---------------------------|--|--|--|--|--|--|--|

|           |                       |           |  |         |  |          |  |
|-----------|-----------------------|-----------|--|---------|--|----------|--|
| <b>7.</b> | <b>Marital status</b> | Unmarried |  | Married |  | Divorced |  |
|-----------|-----------------------|-----------|--|---------|--|----------|--|

|           |                 |         |  |       |  |              |  |
|-----------|-----------------|---------|--|-------|--|--------------|--|
| <b>8.</b> | <b>Resident</b> | Farasan |  | Jazan |  | Other cities |  |
|-----------|-----------------|---------|--|-------|--|--------------|--|

|           |                           |           |  |             |  |
|-----------|---------------------------|-----------|--|-------------|--|
| <b>9.</b> | <b>Types of residence</b> | Hosteller |  | Day scholar |  |
|-----------|---------------------------|-----------|--|-------------|--|

**[SECTION: B]**

|                                                                                                               |
|---------------------------------------------------------------------------------------------------------------|
| <b>Self-Medication Practices [Please note that your response should be based on last 3 months experience]</b> |
|---------------------------------------------------------------------------------------------------------------|

1. Did you have any disease in last three months?                      Yes                      No
2. Have you taken self-medication in last 3-months?                      Yes                      No

3. What was your reason for self-medication with analgesics?  
**(You can select multiple choices by placing a tick mark (v) in the appropriate boxes below)**

|                                              |                                      |
|----------------------------------------------|--------------------------------------|
| ? Doctor / Clinic far from home              | ? Saves time                         |
| ? High fees of doctor                        | ? I have old prescription            |
| ? Doctor is busy with many patients          | ? I have medicines of family members |
| ? No trust in doctor                         | ? Pharmacist advice                  |
| ? Disease does not merit to consult a Doctor | ? Busy Academic Schedule             |
| ? Others                                     |                                      |

4. For which disease you have taken self-medication in last 3 months?  
**(You can select multiple choices by placing a tick mark (v) in appropriate boxes below)**

|  |                            |                         |
|--|----------------------------|-------------------------|
|  | ? Headache                 | ? Eye infection         |
|  | ? Dandruff                 | ? Running nose/Cold/Flu |
|  | ? Hair fall                | ? Ear pain              |
|  | ? Migraine                 | ? Asthama               |
|  | ? Dental pain              | ? Epilepsy              |
|  | ? Others                   |                         |
|  |                            |                         |
|  | ? Difficulty in swallowing | ? Body ache             |
|  | ? Acidity                  | ? Skin rashes           |
|  | ? Muscular pain            | ? Fever                 |
|  | ? Nausea                   | ? Mycoses               |
|  | ? Diarrhea/Appendicitis    | ? Gastroenteritis       |
|  | ? Others                   |                         |
|  |                            |                         |
|  | ? Joint pain               | ? Pain of Burns         |
|  | ? Muscle pain              | ? Menstruation pain     |
|  | ? UTIs                     | ? Birth control         |
|  | ? Wounds                   | ? Menstrual problems    |
|  | ? Genital infection        | ? Others                |
|  |                            |                         |

5. Which of the following analgesics and antibiotics were used for self-medication?  
**(You can select multiple choices by placing a tick mark (v) in the appropriate boxes below)**

|                                  |                          |
|----------------------------------|--------------------------|
| ? Diclofenac                     | ? Amoxicillin            |
| ? Aspirin                        | ? Doxycycline            |
| ? Meloxicam                      | ? Azithromycin           |
| ? Ibuprofen                      | ? Metronidazole          |
| ? Acetaminophen (Panadol/Crocin) | ? Ampicillin             |
| ? Any other NSAIDs:              | ? Any other Antibiotics: |

6. Have you used any of the above mentioned antibiotics to manage pain?  
**(You can select multiple choices by placing a tick mark (v) in the appropriate boxes below)**

|       |      |
|-------|------|
| ? Yes | ? No |
|-------|------|

7. What do you consider while selecting the drug for self-medication?  
**(You can select multiple choices by placing a tick mark (v) in the appropriate boxes below)**

|                                                                                                     |
|-----------------------------------------------------------------------------------------------------|
| ? Price                                                                                             |
| ? Pharmaceutical Company                                                                            |
| ? Type of medicine                                                                                  |
| ? Brand. <b>If you select any specific brand, then answer question 6, or else go to question 6.</b> |
| ? Others                                                                                            |

8. Your selection of particular brand depends on which of the following choices?  
**(You can select multiple choices by placing a tick mark (v) in the appropriate boxes below)**

|                                    |                              |
|------------------------------------|------------------------------|
| ? Recommended by pharmacist        | ? Old prescription of doctor |
| ? Used by peers – friends / family | ? Advertisement              |
| ? My previous experience           | ? Other                      |

9. Sources from where you obtain your drugs for self-medication?  
**(You can select multiple choices by placing a tick mark (v) in the appropriate boxes below)**

|                                                 |                           |
|-------------------------------------------------|---------------------------|
| ? Pharmacy shop                                 | ? Online shopping         |
| ? Primary health care center /University Clinic | ? Medical representatives |
| ? Friends / family /Old prescriptions           | ? Other, Please explain:  |

10. Do you check the prescribing information before self-medicating?  
**(Select only 1 choice by placing a tick mark (v) in the appropriate box below)**

|               |             |                  |
|---------------|-------------|------------------|
| ? Yes, always | ? No, never | ? Yes, sometimes |
|---------------|-------------|------------------|

11. How much did you understand from the instructions of prescribing information?  
**(Select only 1 choice by placing a tick mark (v) in the appropriate box below)**

|                    |                        |                  |
|--------------------|------------------------|------------------|
| ? Fully understood | ? Partially understood | ? Not interested |
|--------------------|------------------------|------------------|

12. Have you ever experienced Adverse Drug Reactions (ADRs) with self-medication of analgesics?

|      |                             |
|------|-----------------------------|
| ? No | ? Yes. Please explain _____ |
|------|-----------------------------|

**If answer to question 12 is yes, then solve question 13. If not, then go to question 12.**

13. What did you do for the adverse event you experienced?  
**(You can select multiple choices by placing a tick mark (v) in the appropriate boxes below)**

|                                    |                             |
|------------------------------------|-----------------------------|
| ? Go to private doctor             | ? Go to pharmacist          |
| ? Go to primary health care center | ? Stop taking medication    |
| ? Friends / family                 | ? Any other, Please specify |

14. Are you taking analgesics as NSAIDs and acetaminophen for any chronic disease?  
(Chronic disease in this study is defined as a disease lasting three months or longer.)

|      |       |
|------|-------|
| ? No | ? Yes |
|------|-------|

**If answer to 14 is yes then solve question 15.**

15. For how long you have been practicing self-medication of NSAIDs and acetaminophen for any chronic disease?

| S. Nos. | Name of disease | Time periods in months |
|---------|-----------------|------------------------|
| 1.      |                 |                        |
| 2.      |                 |                        |

**THANKYOU FOR YOUR PARTICIPATION**
